# Supplementary material
Source: HighWire-hosted journal article supplement (https://bmjopen.bmj.com/content/15/4/e087934)
Supplement: inline-supplementary-material-5 [file inline-supplementary-material-5.pdf]

## Standard Protocol Items: Recommendations for Interventional Trials checklist

We used the SPIRITStandard Protocol Items: Recommendations for Interventional Trials checklist when writing our report.
